# Supplementary material
Source: publisher figshare collection journal article supplement (https://frontiersin.figshare.com/ndownloader/files/31144177)
Supplement: Supplementary file [file 31144177]

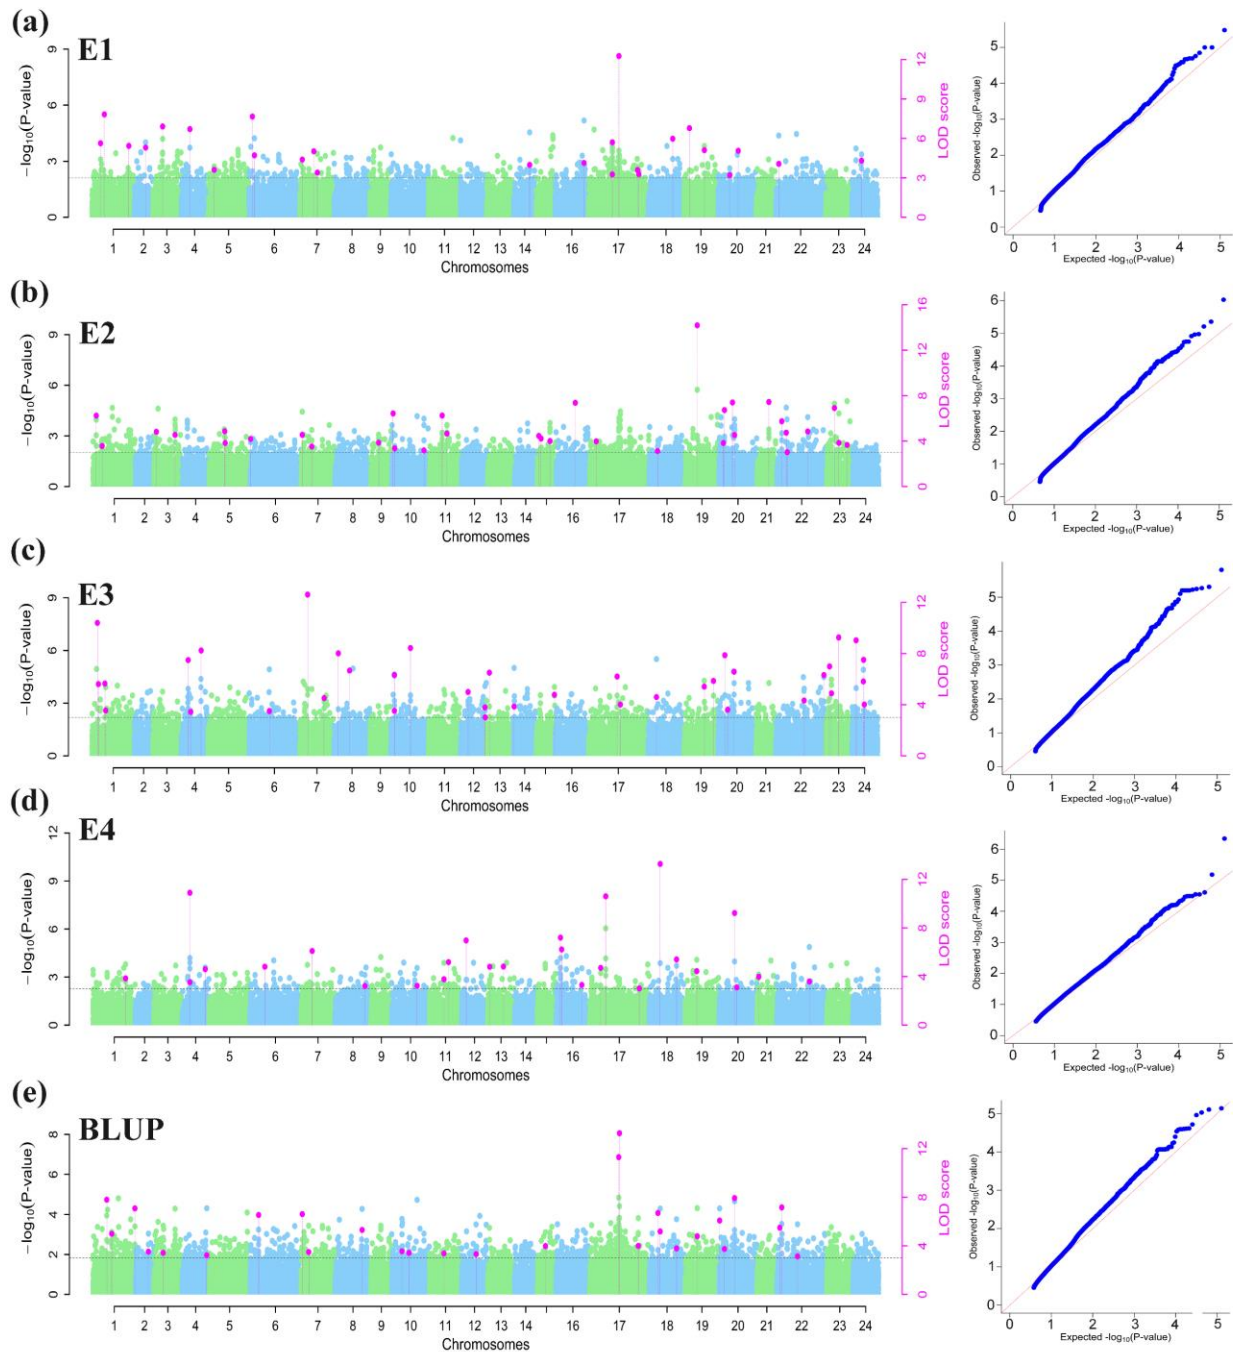

**Supplementary Figure 2. Manhattan and q-q plot of association mapping of tobacco bacterial wilt.** The small figures (a–e) show significant QTNs in four environments and their BLUP values. The pink dots denote significant QTNs in the second step of the multi-locus models, while light green and light blue colors indicate the  $-\log_{10} p$ -values in the first step. The dashed line on each small figure indicates the LOD score threshold. **E1**: Nanxiong (2013); **E2**: Nanxiong (2014); **E3**: Xikou (2014); **E4**: Nanxiong (2015).
